# Supplementary material for: Microbial Asymmetric Functionalization of β-Cyclocitral-Derived Tetramethyl-Substituted γ-Lactone
Source: PubMed Central journal article supplement (PMC6412764; doi:10.3390/molecules24040666), 2019-02-13
Supplement: molecules-24-00666-s001.pdf [file molecules-24-00666-s001.pdf]

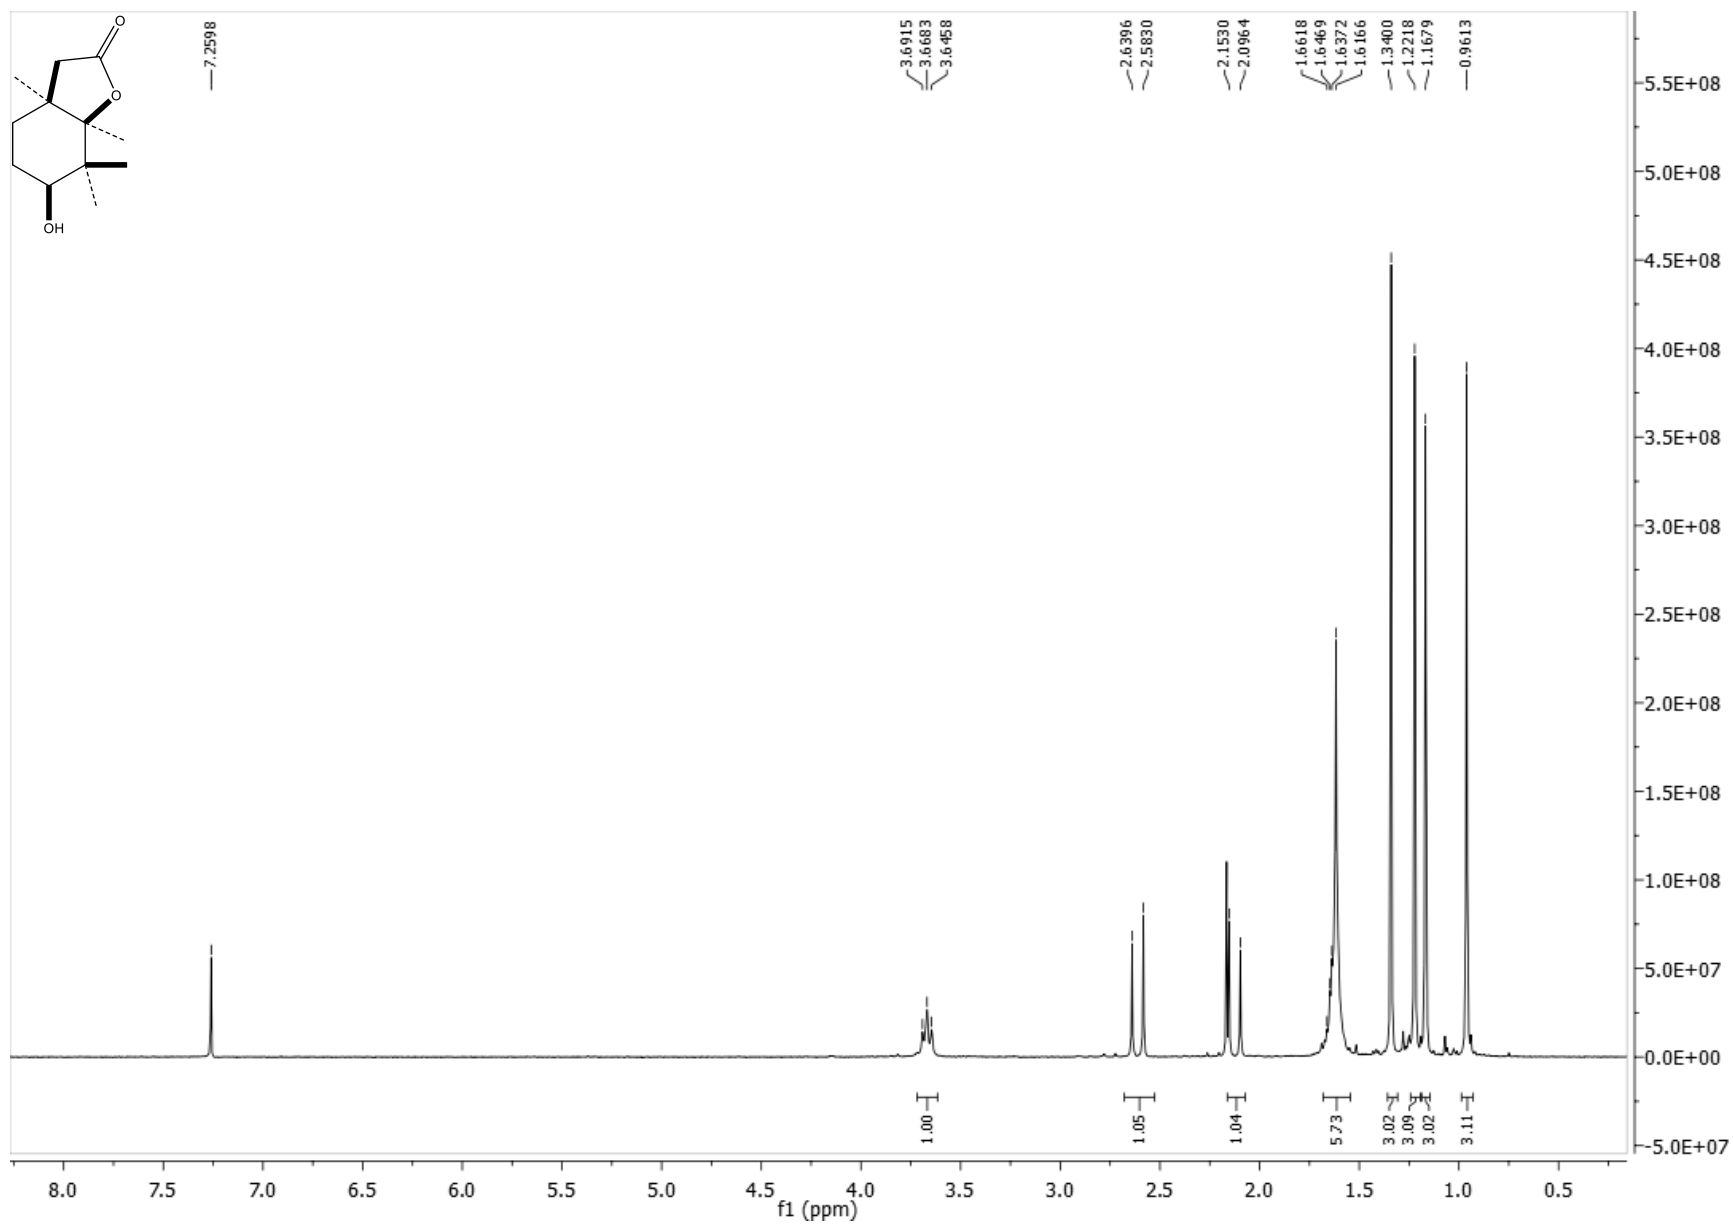

Figure S1.  $^1\text{H}$  NMR lactone 2

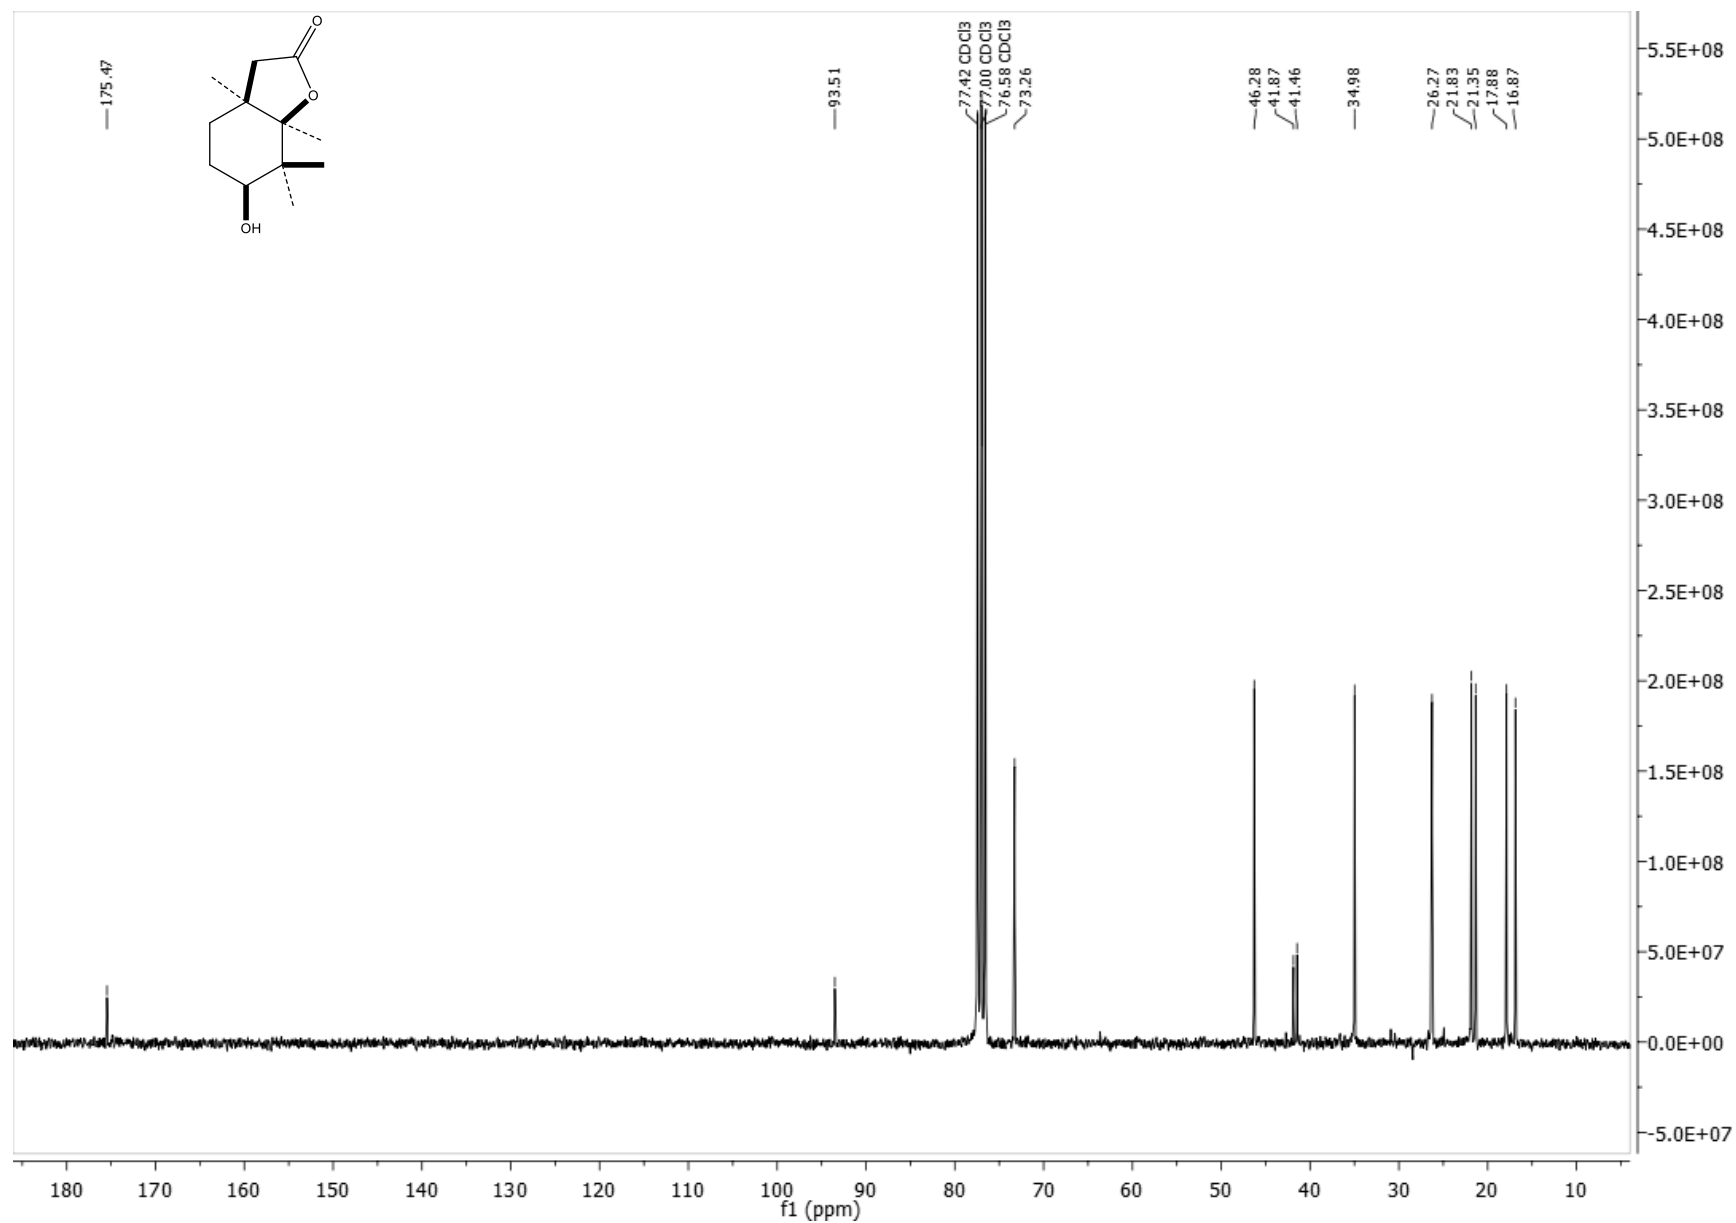

Figure S2.  $^{13}\text{C}$  NMR lactone 2

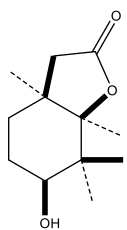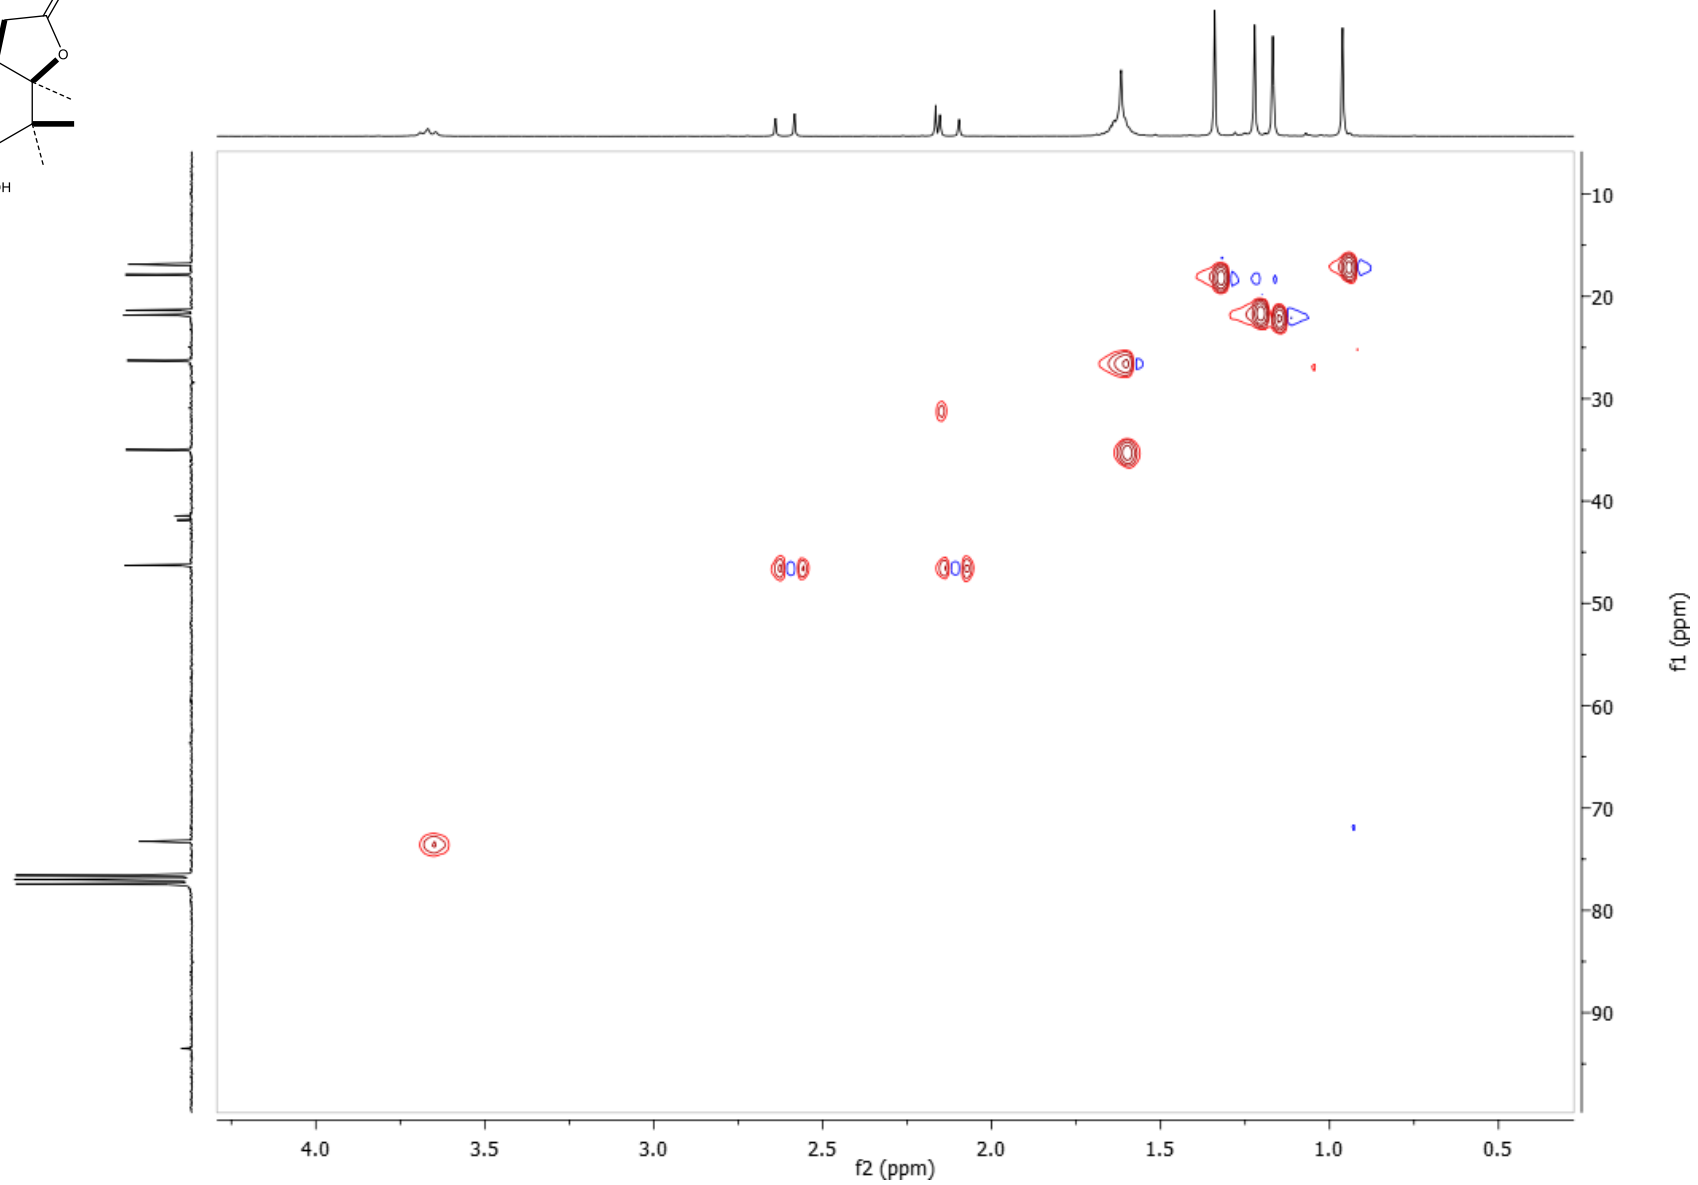

Figure S3. HMBC lactone 2

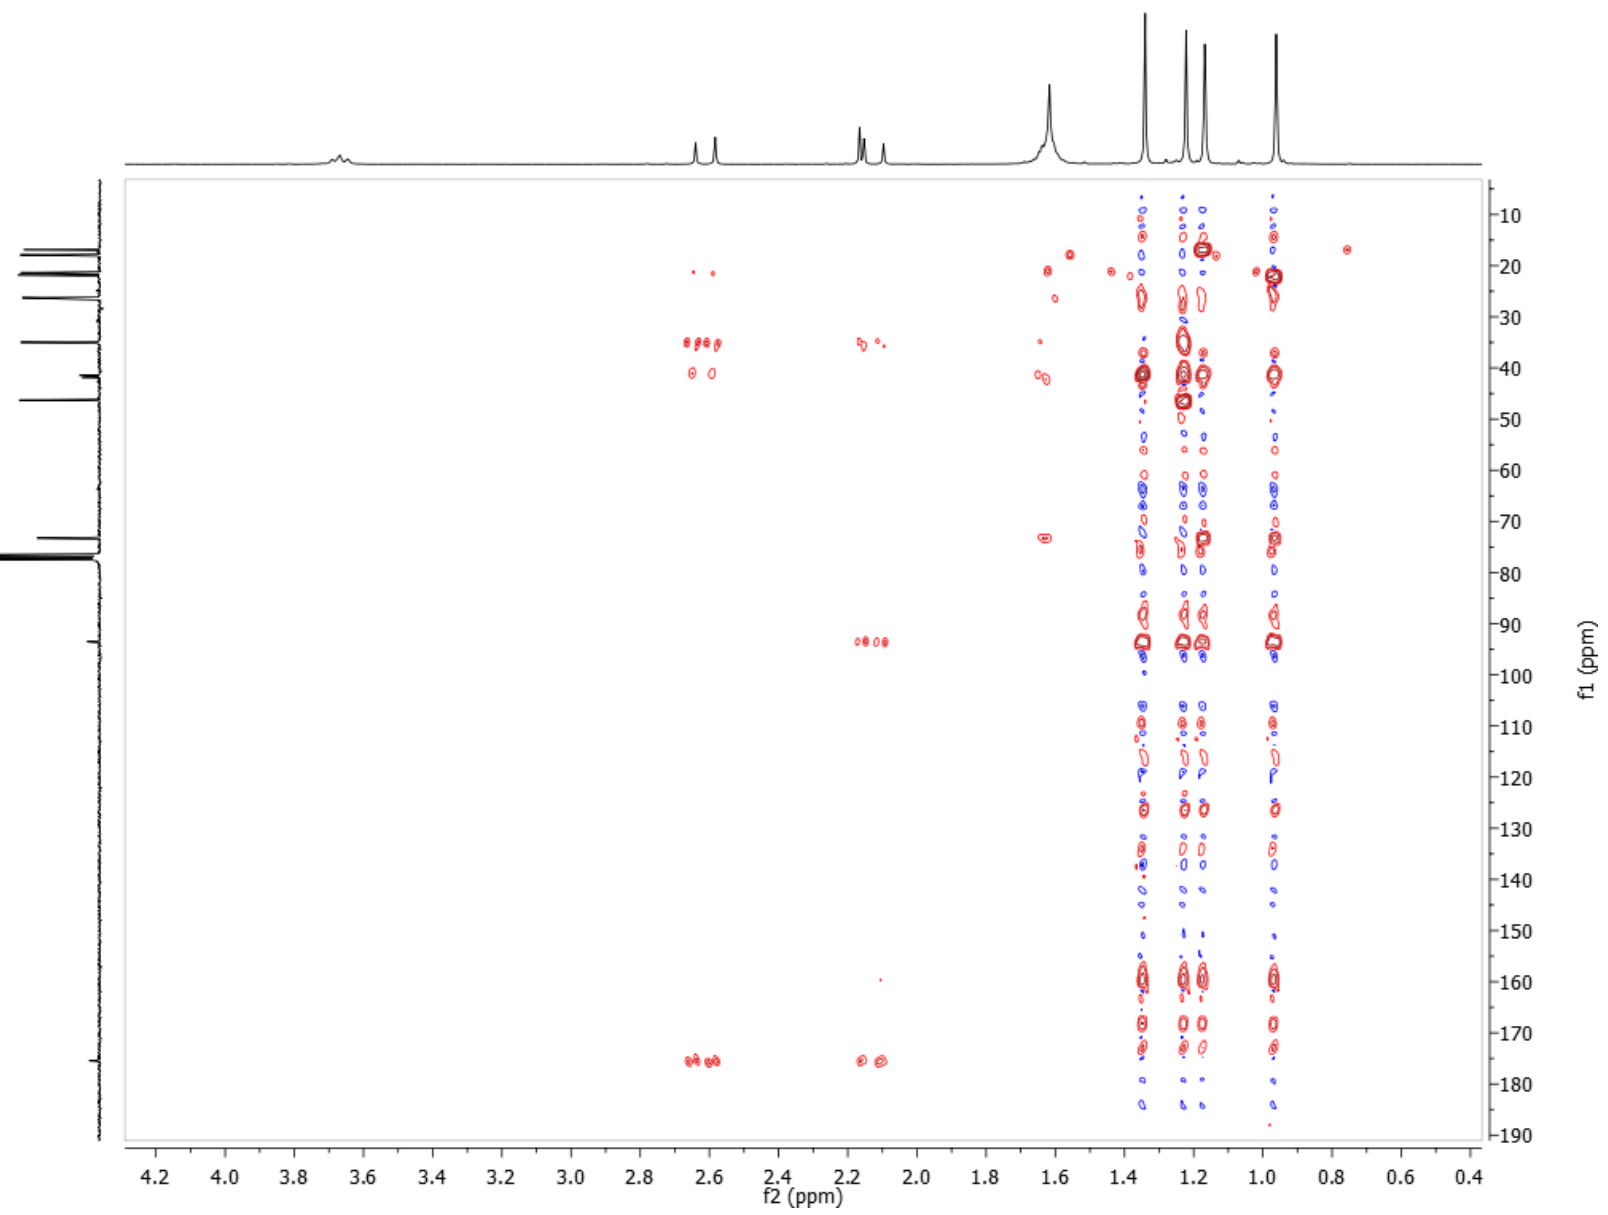

Figure S4. HMBC lactone 2

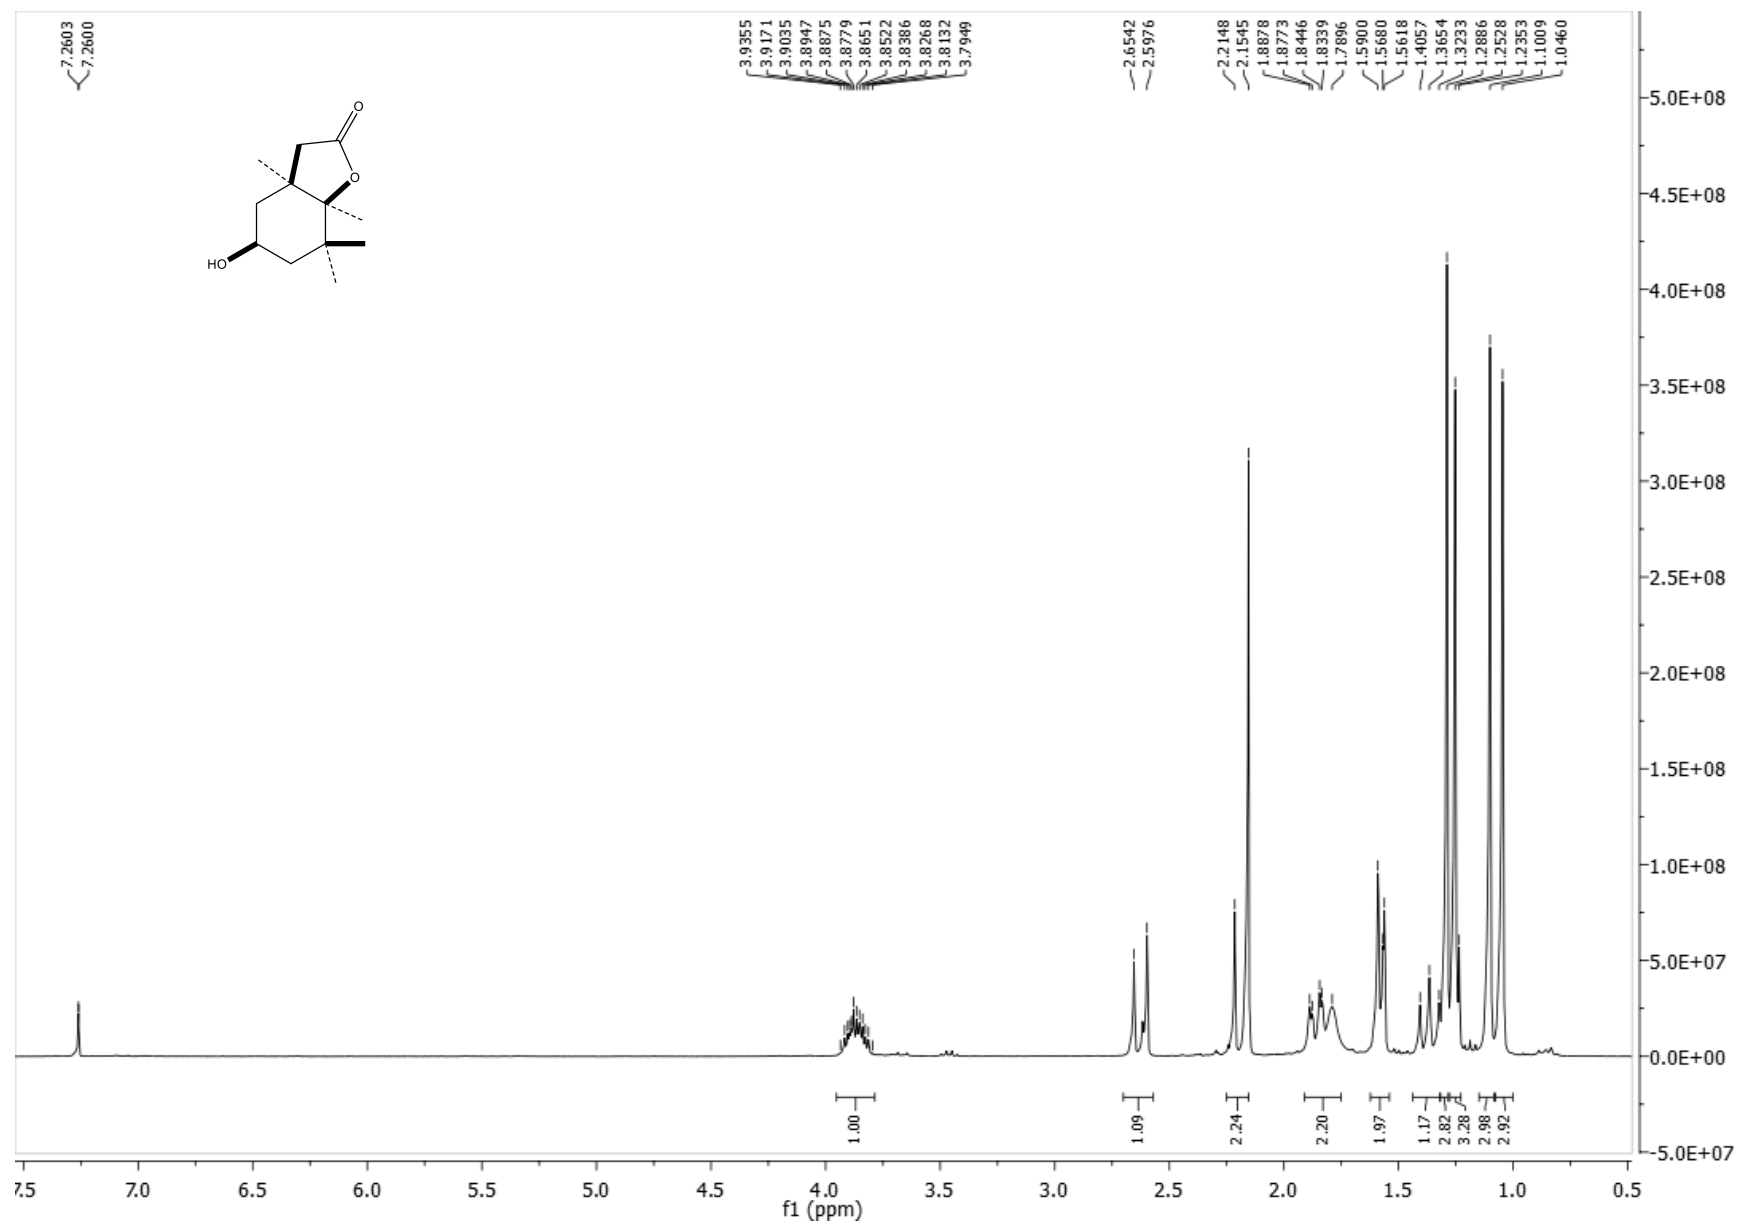

Figure S5. <sup>1</sup>H NMR lactone 3

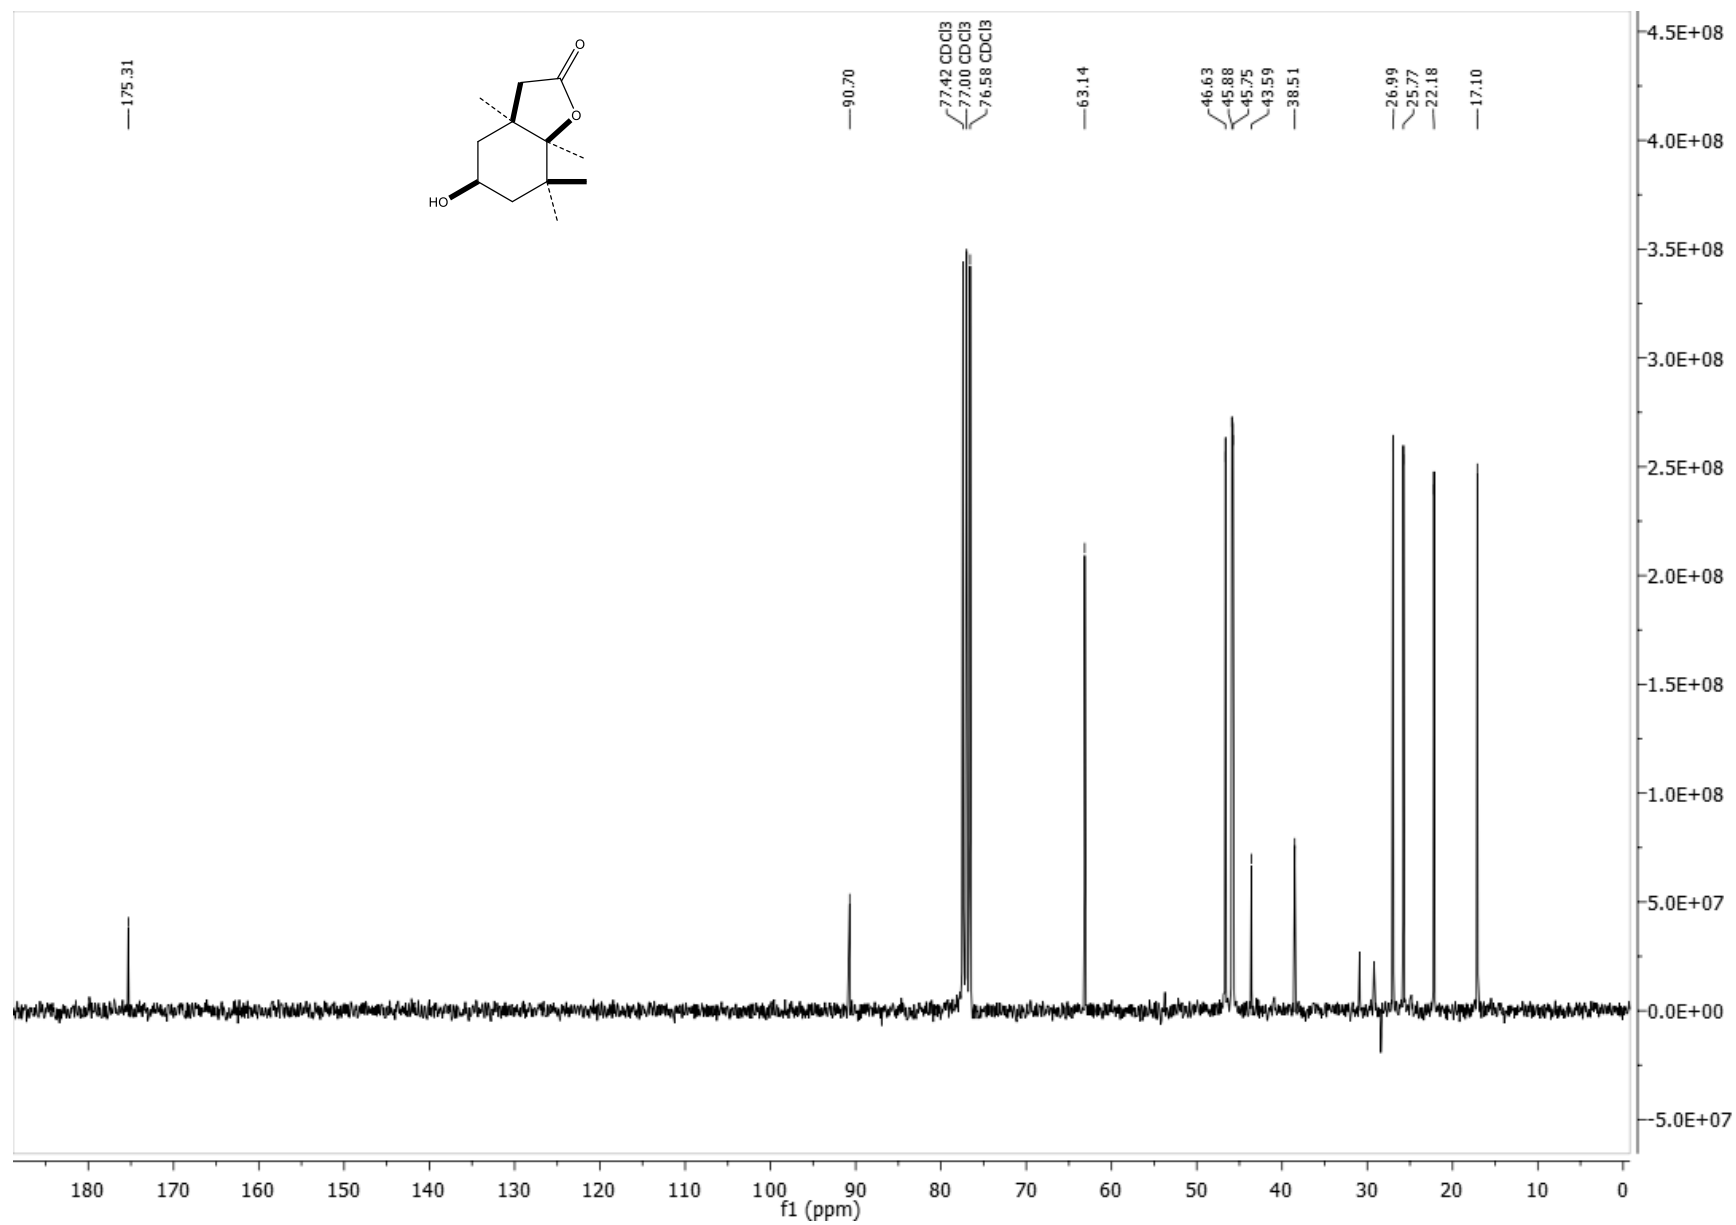

Figure S6. <sup>13</sup>C NMR lactone 3

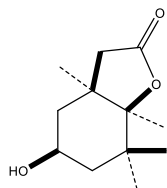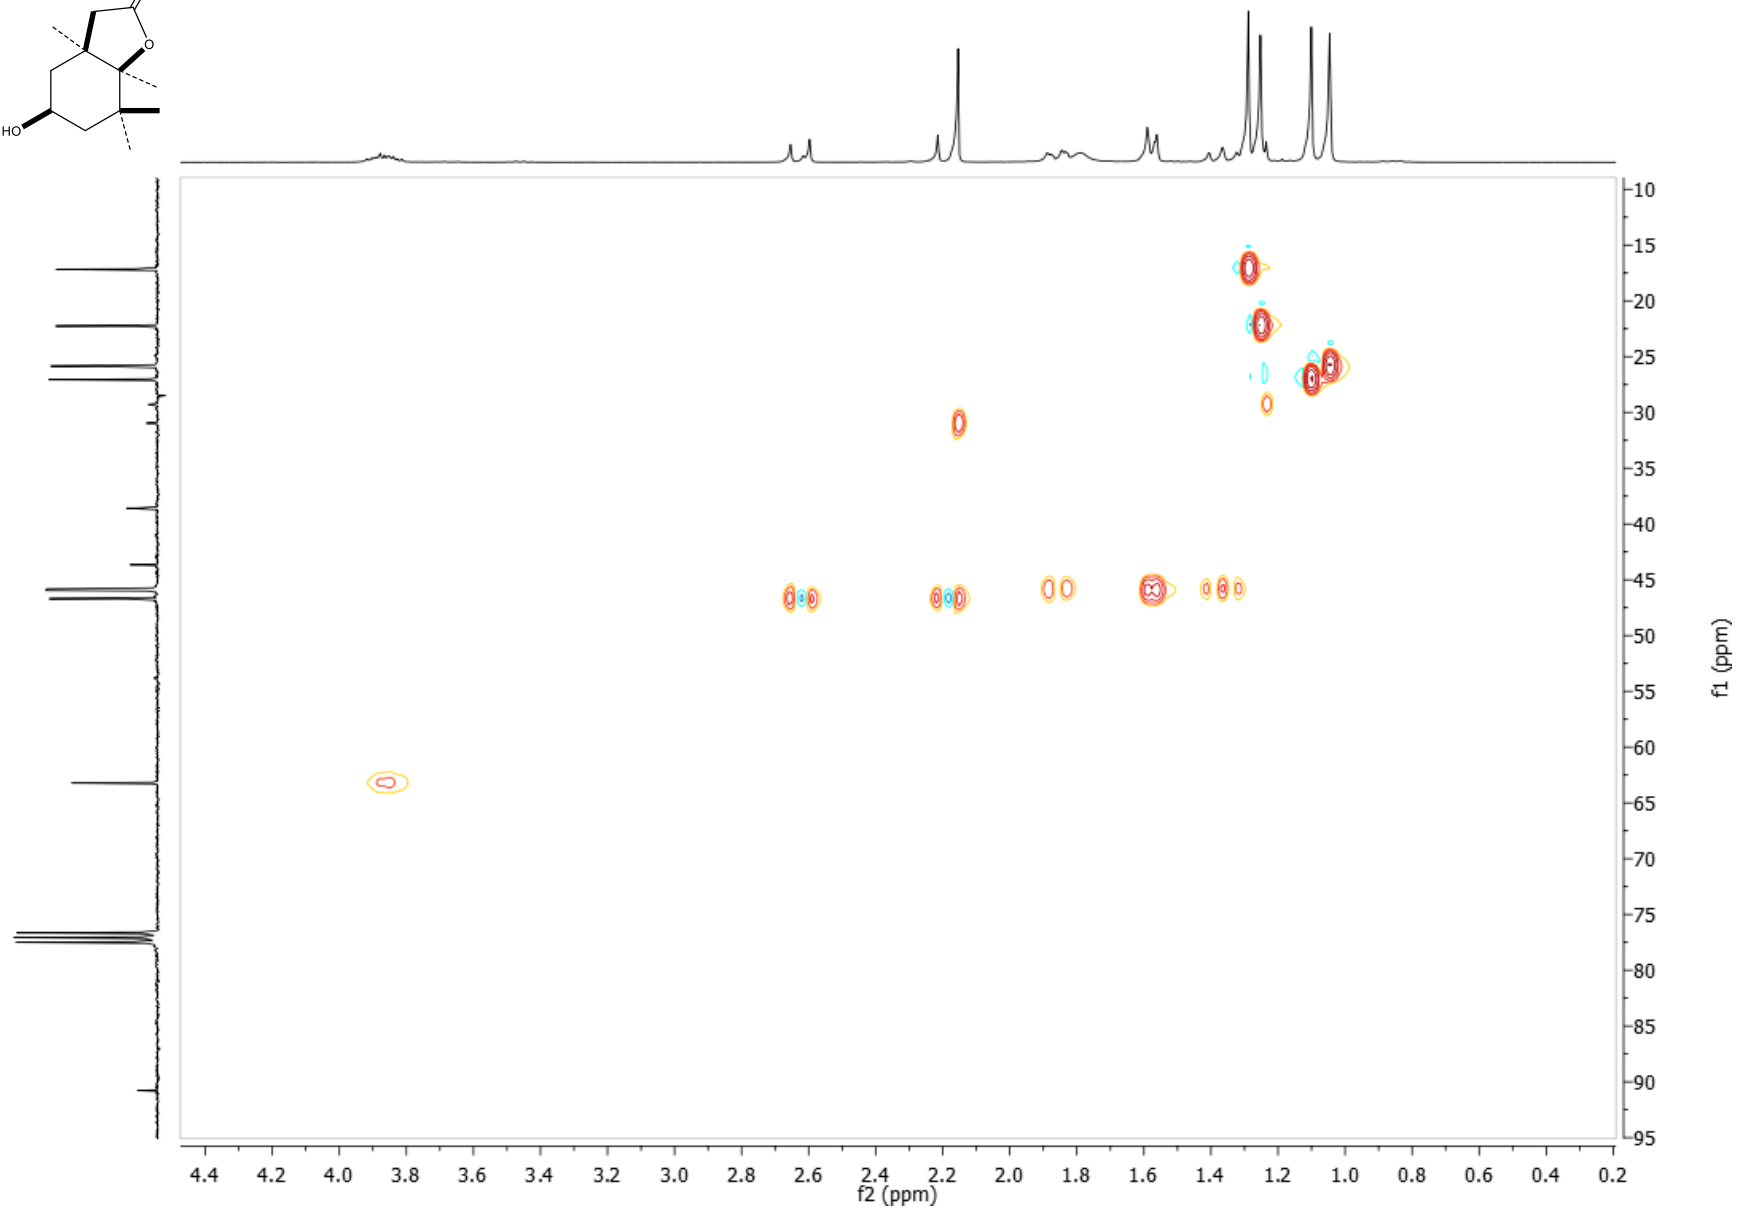

Figure S7. HMQC lactone 3

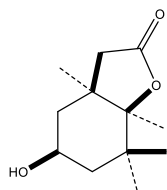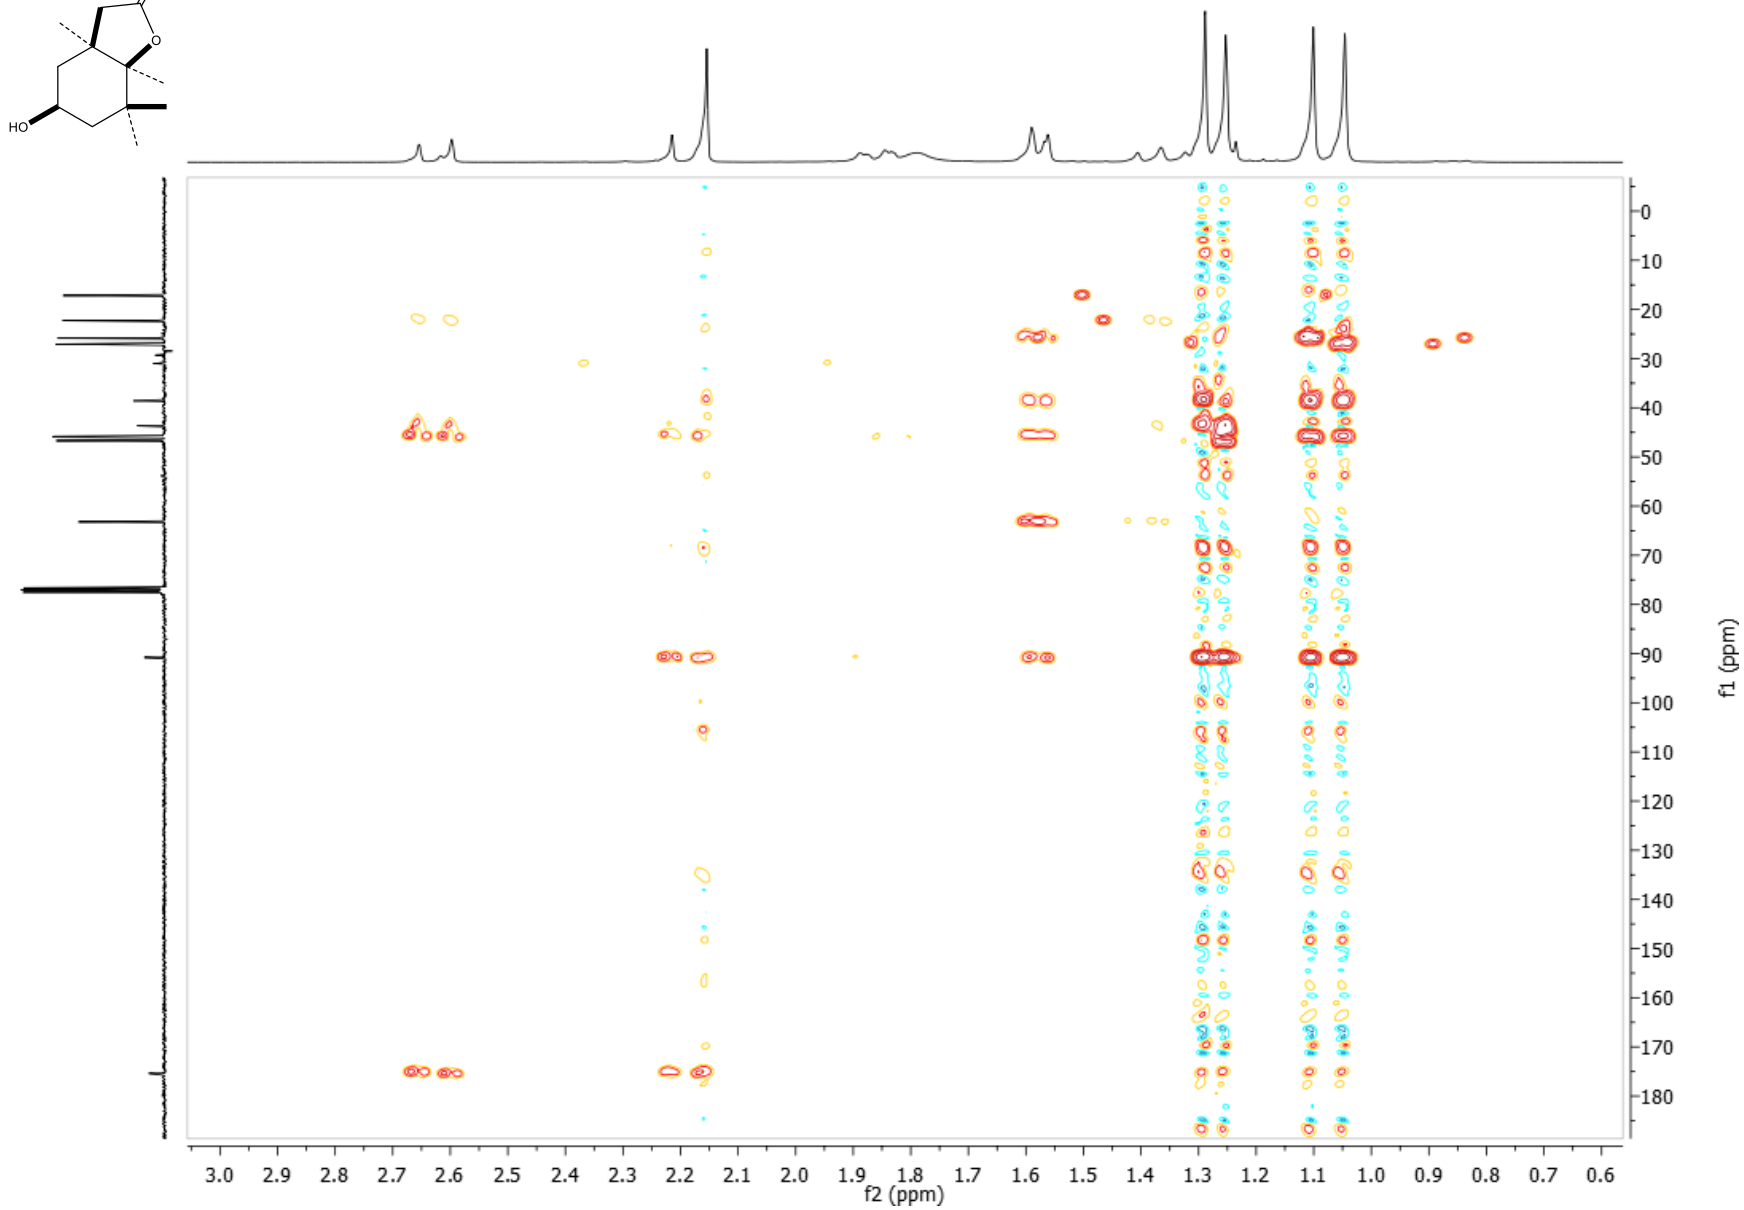

Figure S8. HMBC lactone 3



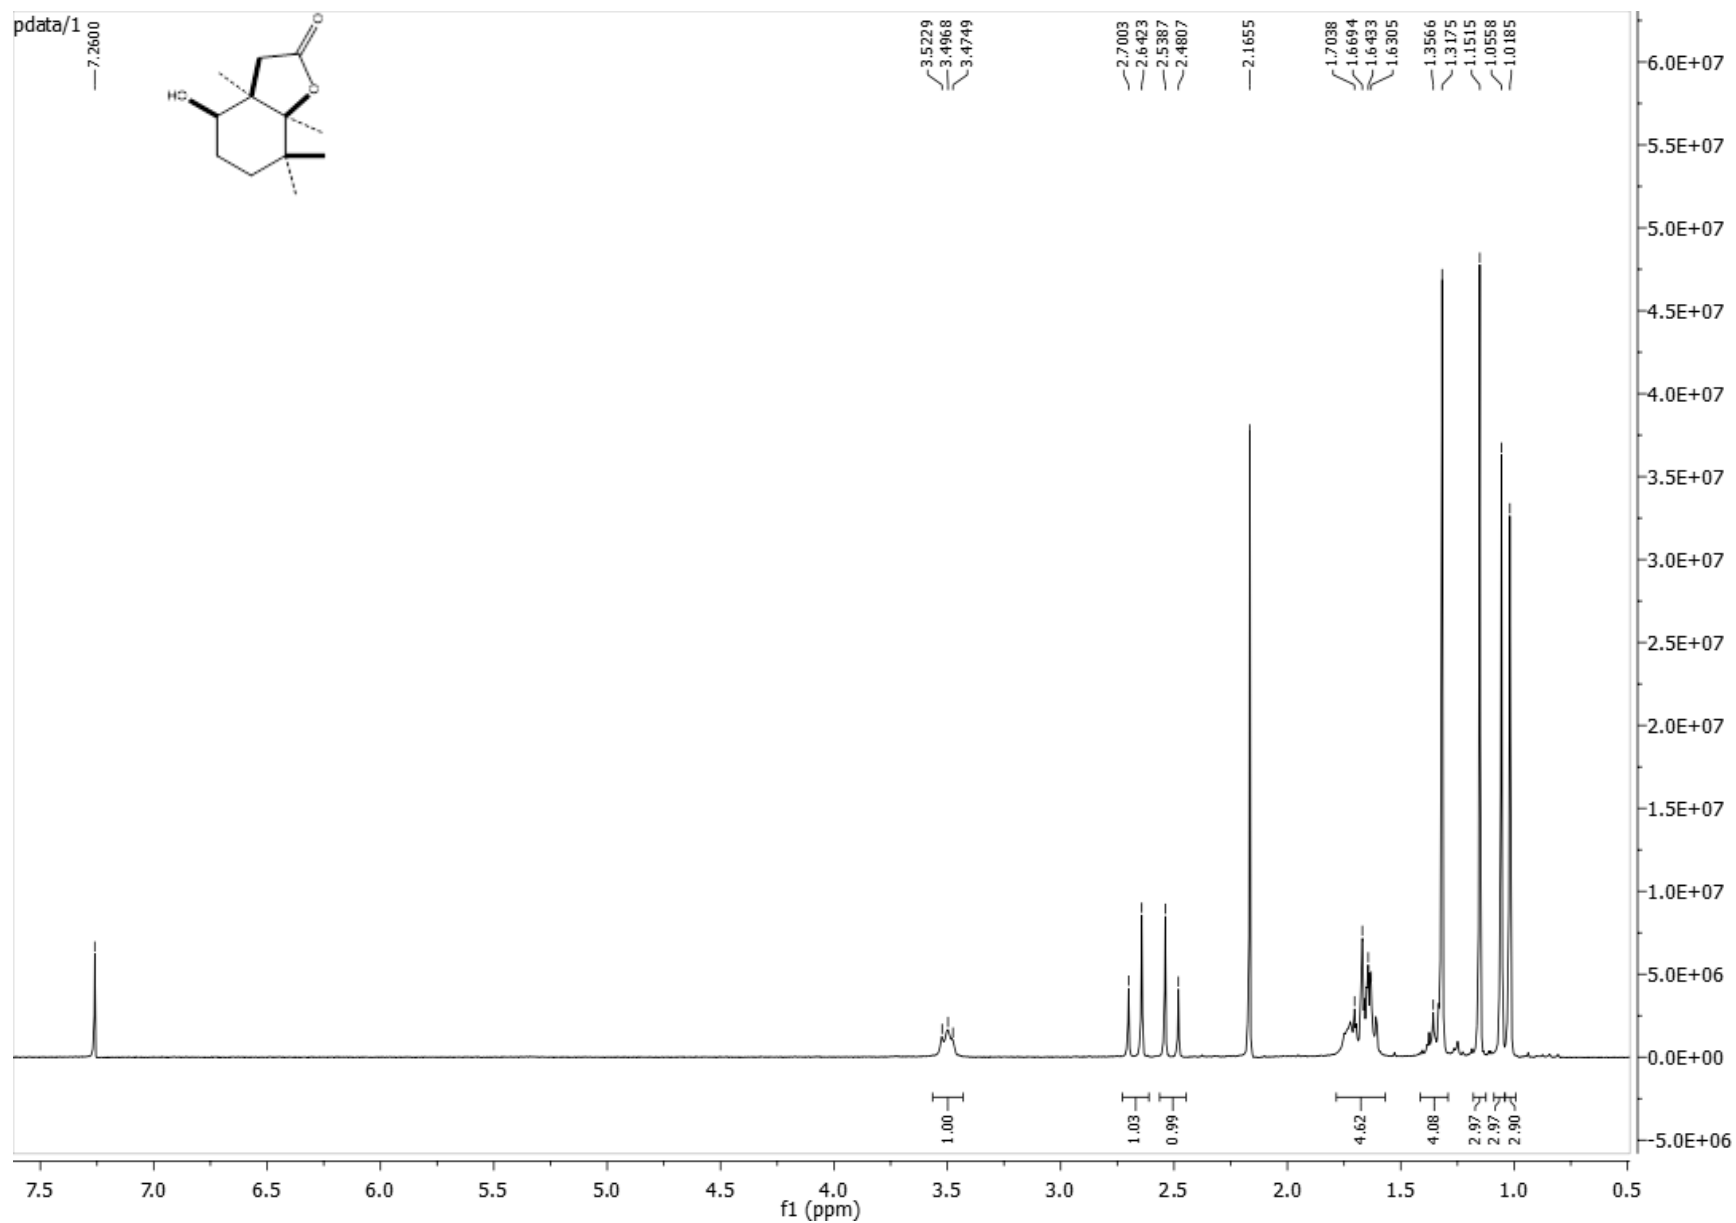

Figure S9. <sup>1</sup>H NMR lactone 4

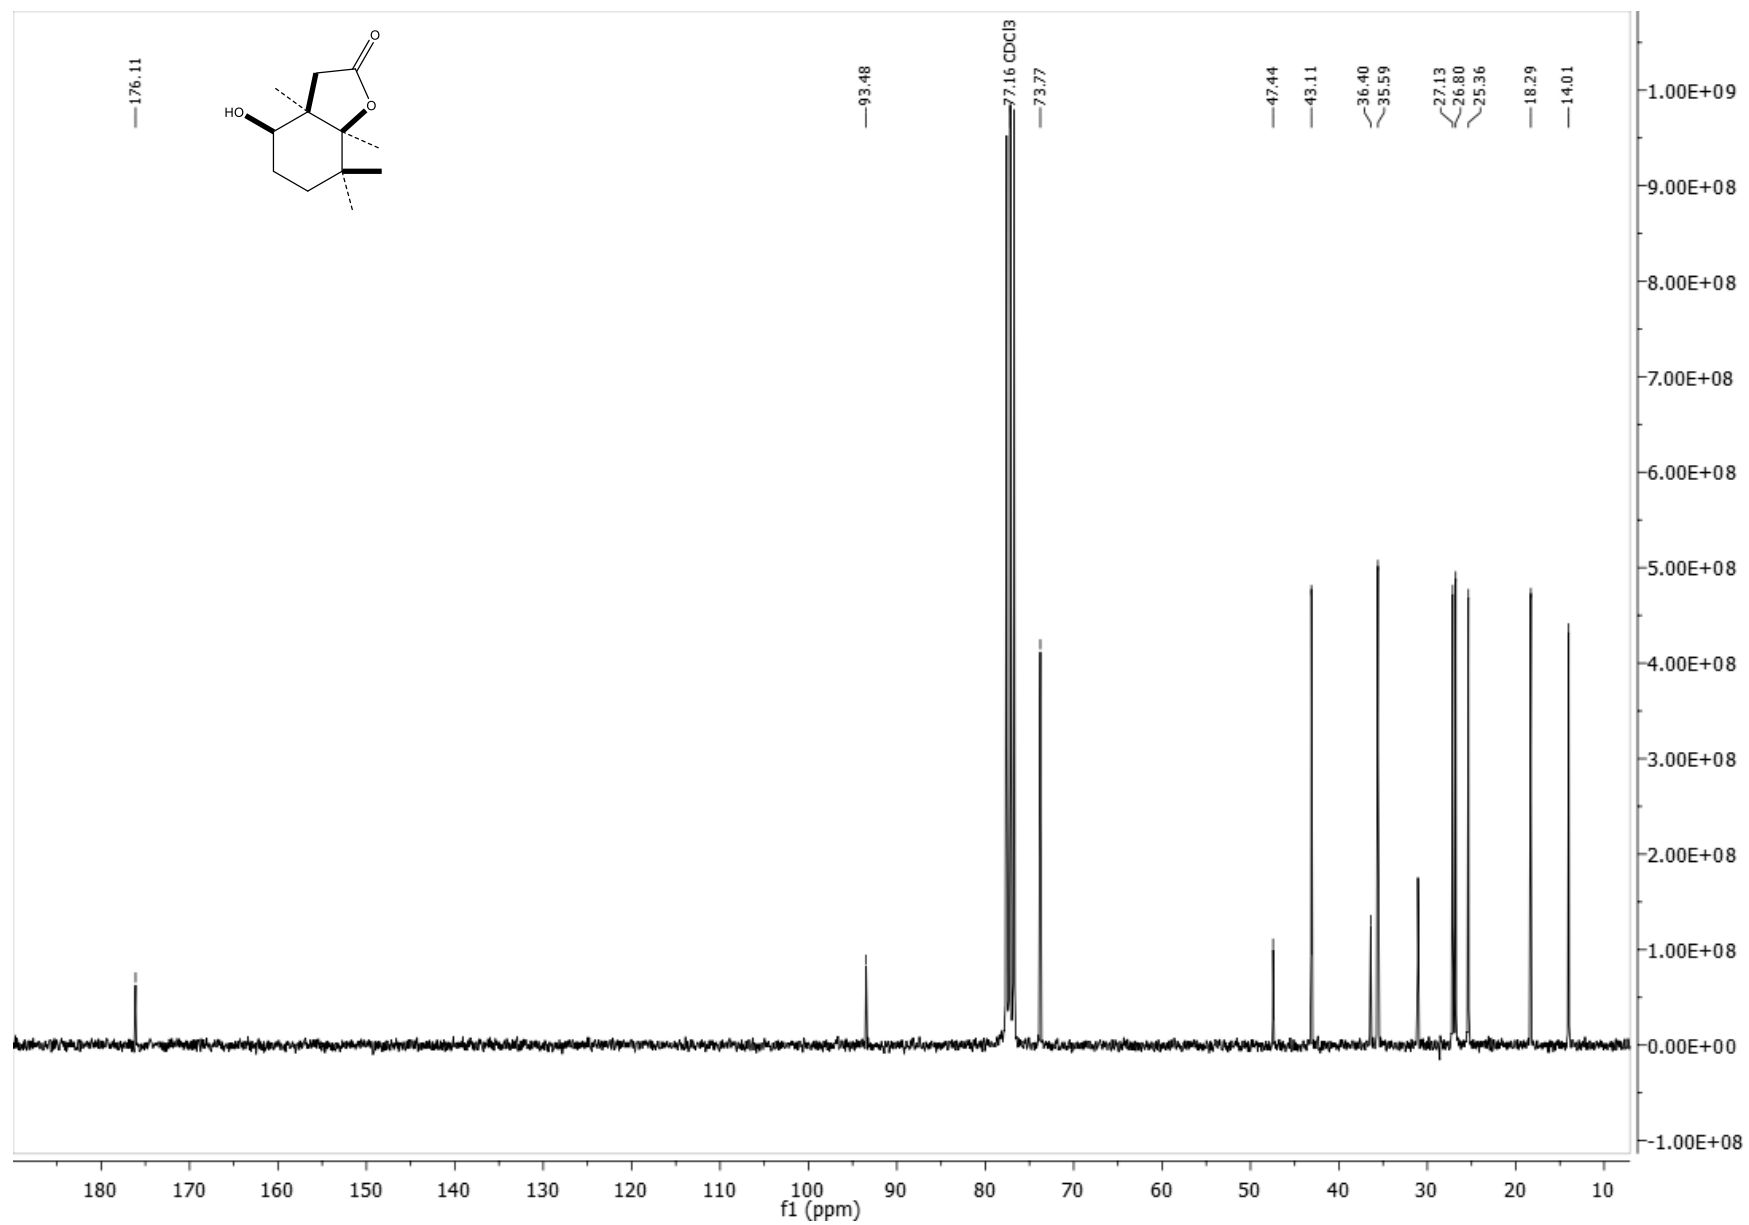

Figure S10.  $^{13}\text{C}$  NMR lactone 4

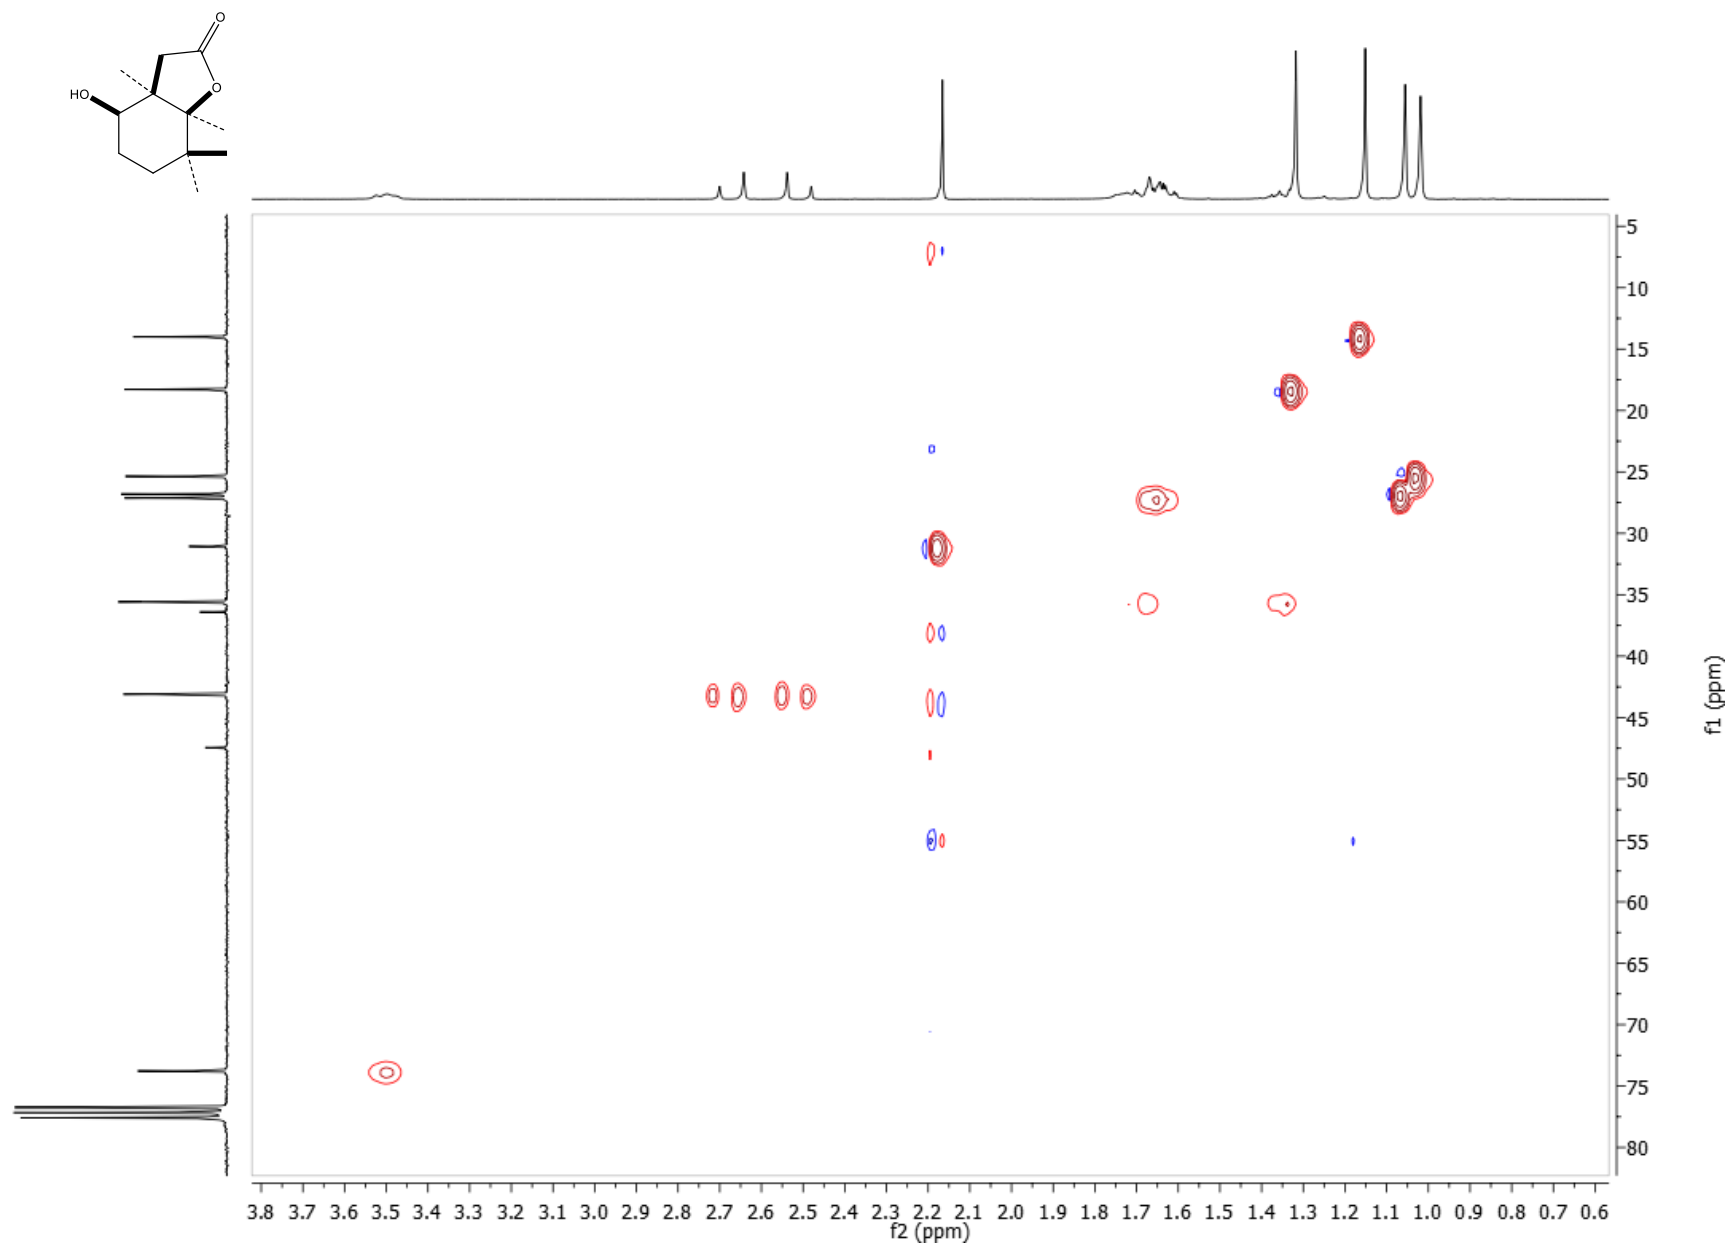

Figure S11. HMQC lactone 4

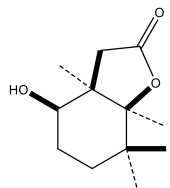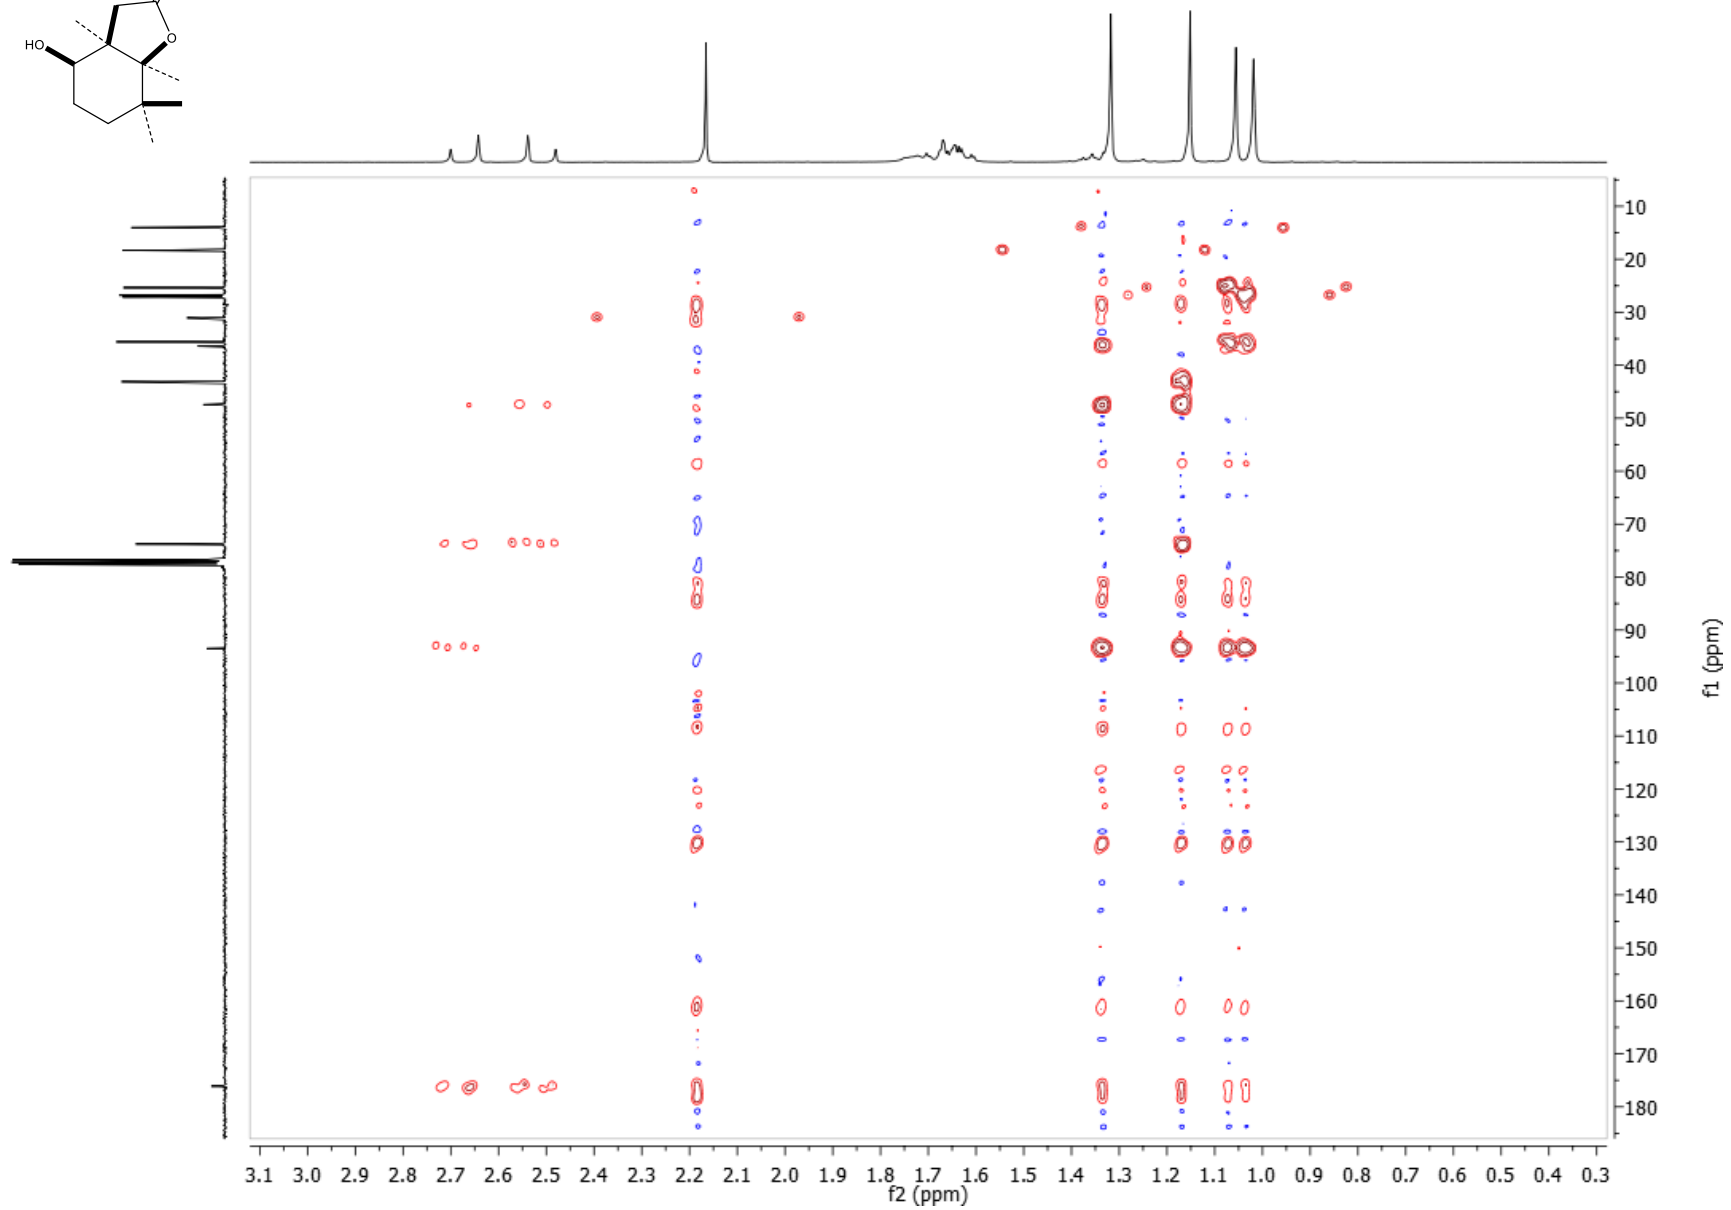

Figure S12. HMBC NMR lactone 4
